# Supplementary material for: Surface EMG-based quantification of inspiratory effort: a quantitative comparison with Pes
Source: Springer Nature journal article supplement (doi:10.1186/s13054-021-03833-w), 2021-12-01
Supplement: MOESM2 [file 19970108]

|              | $PTP_{mus}/\text{min}$<br>( $\text{cmH}_2\text{O s}/\text{min}$ ) | $PTP_{aw}/\text{min}$<br>( $\text{cmH}_2\text{O s}/\text{min}$ ) | $ETP_{di}/\text{min}$<br>( $\mu\text{V s}/\text{min}$ ) | $ETP_{interc}/\text{min}$<br>( $\mu\text{V s}/\text{min}$ ) | $ETP_{sel}/\text{min}$<br>( $\mu\text{V s}/\text{min}$ ) | MV<br>(L/min) | iPEEP<br>( $\text{cmH}_2\text{O}$ ) | $PTP_{mus,EMG}/\text{min}$<br>( $\text{cmH}_2\text{O s}/\text{min}$ ) |
|--------------|-------------------------------------------------------------------|------------------------------------------------------------------|---------------------------------------------------------|-------------------------------------------------------------|----------------------------------------------------------|---------------|-------------------------------------|-----------------------------------------------------------------------|
| <b>CPAP</b>  | $170.2 \pm 54.8$                                                  | $2.5 \pm 1.6$                                                    | $42.9 \pm 32.7$                                         | $52.0 \pm 54.1$                                             | $52.1 \pm 41.0$                                          | $7.7 \pm 1.9$ | $2.1 \pm 1.4$                       | $137.4 \pm 47.6$                                                      |
| <b>PS 5</b>  | $101.9 \pm 60.2$                                                  | $65.2 \pm 9.4$                                                   | $29.4 \pm 24.5$                                         | $44.7 \pm 85.4$                                             | $37.3 \pm 35.0$                                          | $7.6 \pm 1.8$ | $2.2 \pm 1.7$                       | $98.1 \pm 53.2$                                                       |
| <b>PS 10</b> | $48.2 \pm 44.5$                                                   | $118.2 \pm 25.9$                                                 | $13.7 \pm 15.1$                                         | $23.4 \pm 67.9$                                             | $17.1 \pm 21.6$                                          | $7.0 \pm 1.8$ | $1.8 \pm 1.7$                       | $48.4 \pm 41.8$                                                       |
| <b>PS 15</b> | $33.8 \pm 30.7$                                                   | $143.3 \pm 34.2$                                                 | $8.4 \pm 7.5$                                           | $26.3 \pm 88.5$                                             | $10.0 \pm 8.9$                                           | $6.5 \pm 1.7$ | $1.5 \pm 1.5$                       | $30.3 \pm 26.7$                                                       |
